# Supplementary material for: Preparation of monolithic fibers based on dual functional monomers for solid-phase microextraction of sudan dyes in tomato sauce and egg yolk samples
Source: Royal Society of Chemistry journal article supplement (doi:10.1039/c4ay02279c), 2014-11-10
Supplement: c4ay02279c1.pdf [file c4ay02279c1.pdf]

Electronic Supplementary Material

**Preparation of monolithic fibers based on dual functional monomers  
for solid phase microextraction of sudan dyes in tomato sauce and  
egg yolk samples**

Yulei Wang, Meng Mei, Xiaojia Huang\*, Dongxing Yuan

*State Key Laboratory of Marine Environmental Science, Key Laboratory of the  
Ministry of Education for Coastal and Wetland Ecosystem, College of the  
Environment and Ecology, Xiamen University, Xiamen 361005, China*

**Table S1.** The chemical properties of sudan dyes

| Compounds | Formula                                          | Molecular mass | lg <i>K<sub>ow</sub></i> | CAS       | Chemical structures                                                                  |
|-----------|--------------------------------------------------|----------------|--------------------------|-----------|--------------------------------------------------------------------------------------|
| Sudan I   | C <sub>16</sub> H <sub>12</sub> N <sub>2</sub> O | 248.28         | 4.88                     | 842-07-9  | 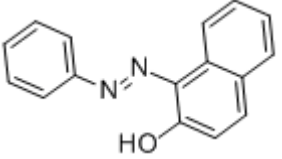  |
| Sudan II  | C <sub>18</sub> H <sub>16</sub> N <sub>2</sub> O | 276.33         | 5.45                     | 3118-97-6 |   |
| Sudan III | C <sub>22</sub> H <sub>16</sub> N <sub>4</sub> O | 352.39         | 6.01                     | 85-86-9   |   |
| Sudan IV  | C <sub>24</sub> H <sub>20</sub> N <sub>4</sub> O | 380.44         | 6.70                     | 85-83-6   |  |

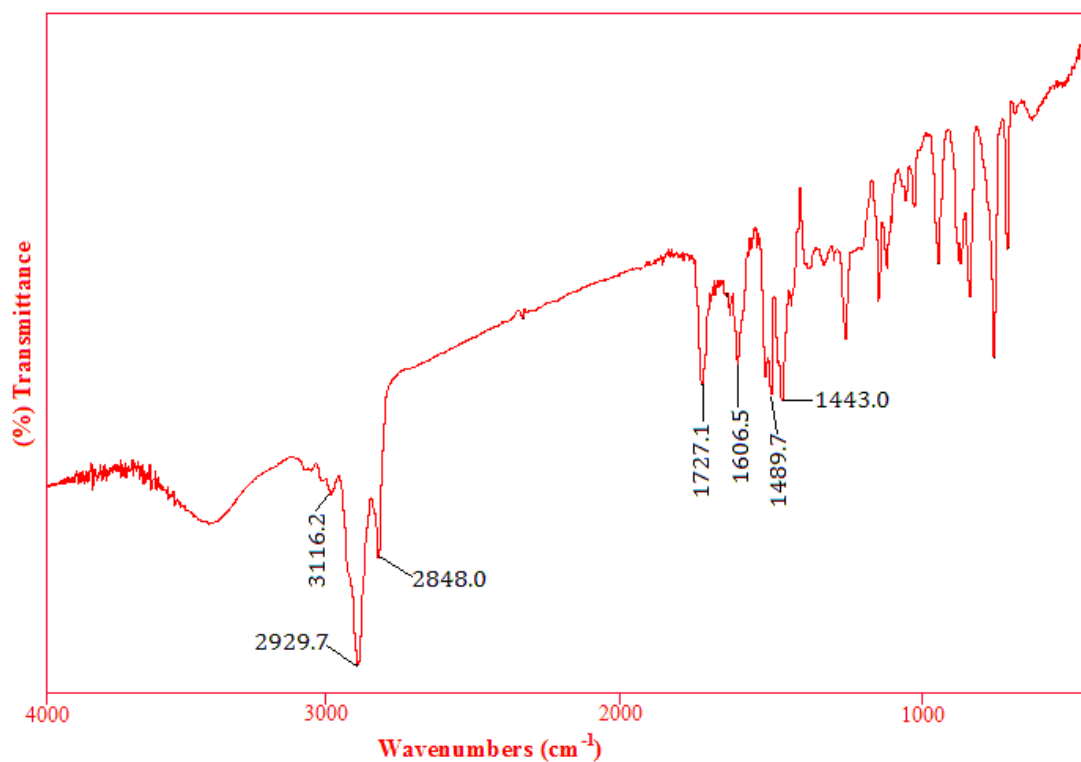

**Fig.S1.** The FT-IR spectrum of poly (OM/VI-DB) monolith

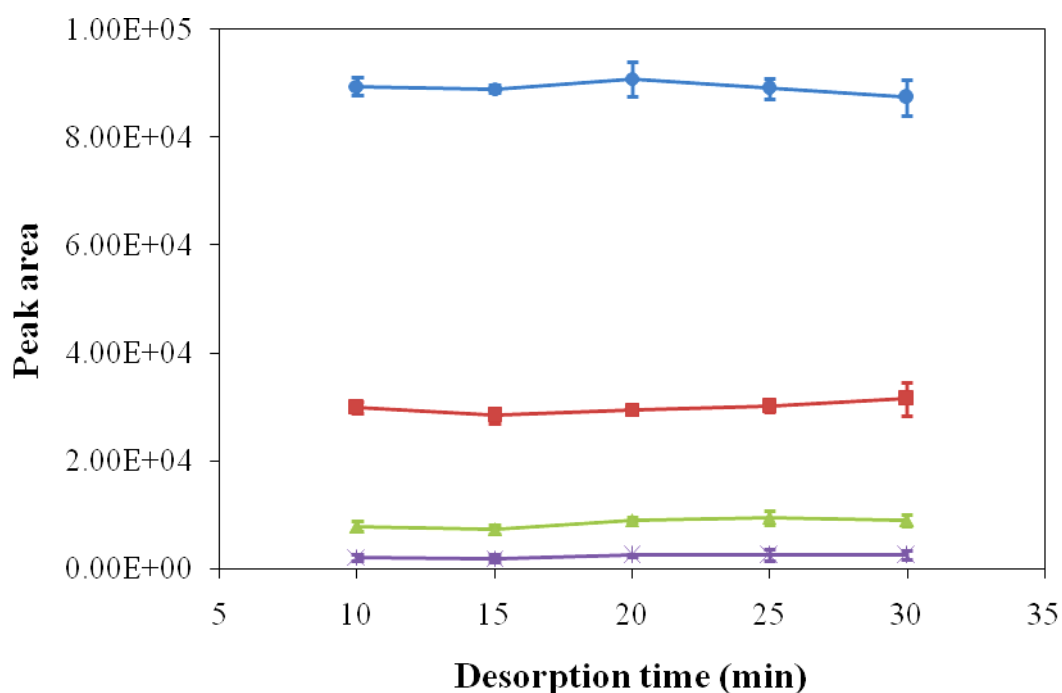

**Fig.S2** The effect of desorption time on extraction efficiency

Conditions: ACN was used as desorption solvent; extraction time was 0.5 h; no salt was added in the sample and the pH values of sample matrix were not adjusted.

The spiked concentration of each analyte was 100 µg/L.

Symbols: ■ Sudan I; ■ sudan II; ■ sudan III; ■ sudan IV
